# Supplementary material for: Insertionally polymorphic sites of human endogenous retrovirus-K (HML-2) with long target site duplications
Source: PubMed Central journal article supplement (PMC5488345; doi:10.1186/s12864-017-3872-6), 2017-06-27
Supplement: 12864_2017_3872_MOESM2_ESM.pdf [file 12864_2017_3872_MOESM2_ESM.pdf]

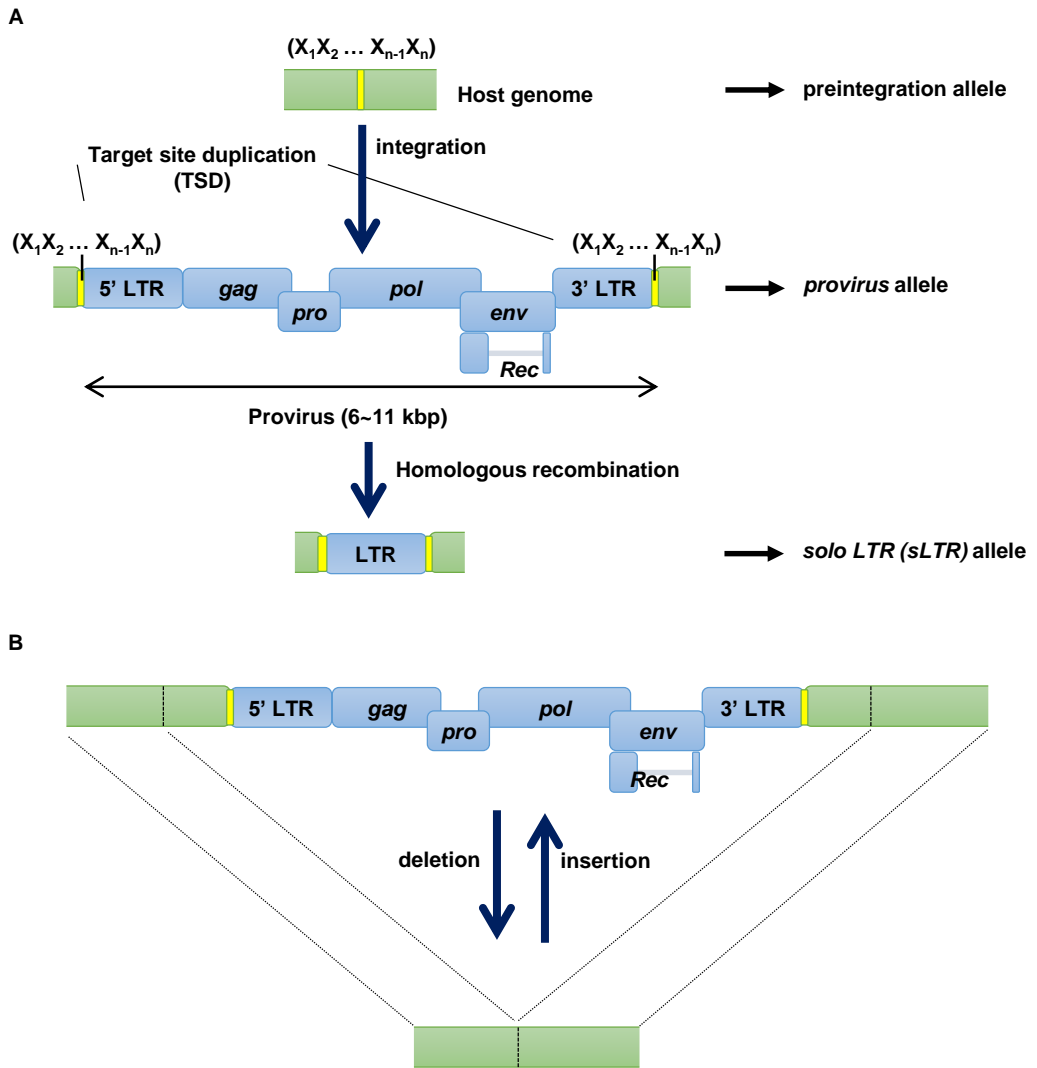

**Additional file 2: Figure S1. Insertional polymorphisms and regional indels in HML-2.** Schemes are shown for polymorphisms (A) and regional indels (B).
