# Supplementary material for: Insertionally polymorphic sites of human endogenous retrovirus-K (HML-2) with long target site duplications
Source: PubMed Central journal article supplement (PMC5488345; doi:10.1186/s12864-017-3872-6), 2017-06-27
Supplement: 12864_2017_3872_MOESM3_ESM.pdf [file 12864_2017_3872_MOESM3_ESM.pdf]

chr11 71875418-71876385

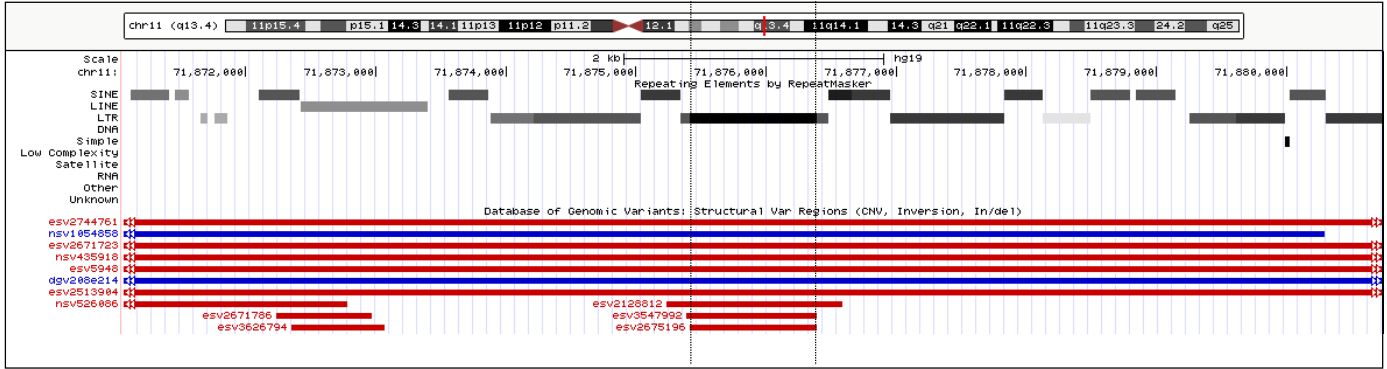

**Additional file 3: Figure S2. LTR site in 11q13.4.** UCSC Genome Browser display for chr11:71875418–71876385

elements are shown as black and gray bars. Red and blue bars denote gain and loss regions, respectively.
