# Supplementary material for: Insertionally polymorphic sites of human endogenous retrovirus-K (HML-2) with long target site duplications
Source: PubMed Central journal article supplement (PMC5488345; doi:10.1186/s12864-017-3872-6), 2017-06-27
Supplement: 12864_2017_3872_MOESM4_ESM.pdf [file 12864_2017_3872_MOESM4_ESM.pdf]

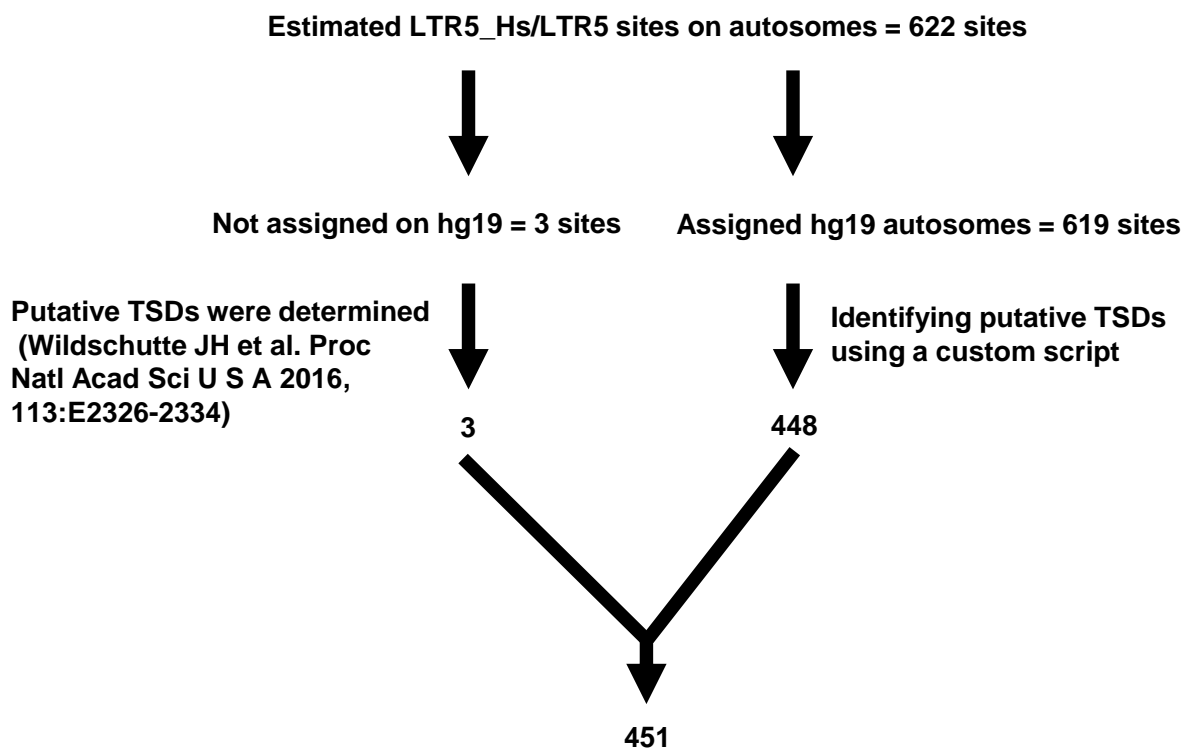

**Additional file 4: Figure S3. Scheme of the TSD analysis.** In total, 451 putative TSDs were finally inferred.
