# Supplementary material for: Insertionally polymorphic sites of human endogenous retrovirus-K (HML-2) with long target site duplications
Source: PubMed Central journal article supplement (PMC5488345; doi:10.1186/s12864-017-3872-6), 2017-06-27
Supplement: 12864_2017_3872_MOESM5_ESM.pdf [file 12864_2017_3872_MOESM5_ESM.pdf]

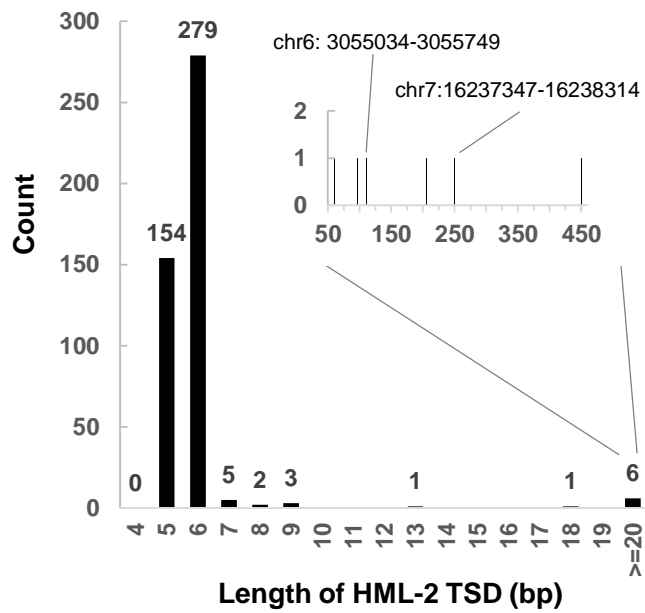

**Additional file 5: Figure S4. Estimation of the TSD lengths.** HML-2 TSD sequences were inferred from the LTR duplicated sequences. In total, 451 HML-2 sites were estimated. The indicated genomic positions on chr6 and chr7 show the HML-2 insertional polymorphisms detected in this study.
