# Supplementary material for: Insertionally polymorphic sites of human endogenous retrovirus-K (HML-2) with long target site duplications
Source: PubMed Central journal article supplement (PMC5488345; doi:10.1186/s12864-017-3872-6), 2017-06-27
Supplement: 12864_2017_3872_MOESM7_ESM.pdf [file 12864_2017_3872_MOESM7_ESM.pdf]

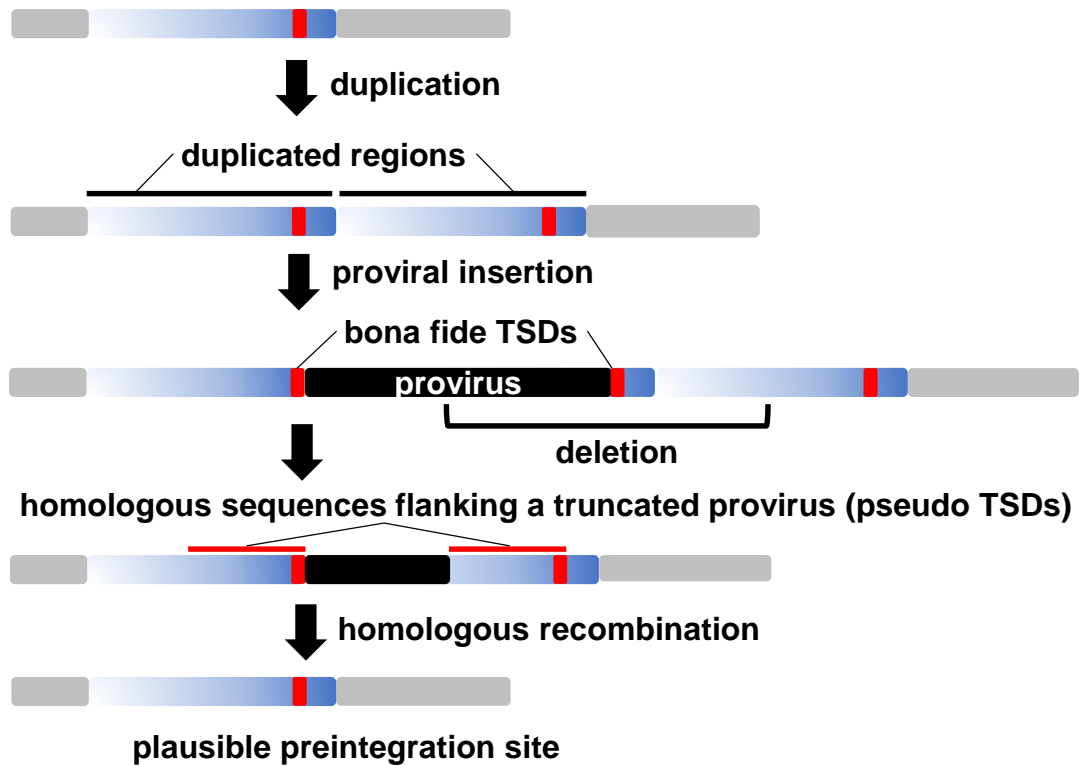

**Additional file 7: Figure S6. Model of pseudo-TSDs flanking a truncated provirus.** This model may explain the long homologous sequences flanking the truncated provirus at 6p25.2. In this model, a plausible preintegration site is formed as a result of successive genomic rearrangements.
